# Supplementary material for: First-principles exploration of the electronic versatility of the GeH/SiSb heterostructure through stacking and electric fields
Source: Royal Society of Chemistry journal article supplement (doi:10.1039/d5na00251f), 2025-01-01
Supplement: d5na00251f1.pdf [file d5na00251f1.pdf]

## Supporting Information (SI)

Nguyen Xuan Sang<sup>1,2</sup>, Khang D. Pham<sup>3,4,†</sup>

<sup>1</sup>*Atomic Molecular and Optical Physics Research Group, Institute for Advanced Study in Technology, Ton Duc Thang University, Ho Chi Minh City, Vietnam. Email: [nguyenxuansang@tdtu.edu.vn](mailto:nguyenxuansang@tdtu.edu.vn)*

<sup>2</sup>*Faculty of Electrical and Electronics Engineering, Ton Duc Thang University, Ho Chi Minh City, Vietnam*

<sup>3</sup>*Institute of Research and Development, Duy Tan University, Da Nang 550000, Vietnam. E-mail: [phamdinhkhang@duytan.edu.vn](mailto:phamdinhkhang@duytan.edu.vn)*

<sup>4</sup>*School of Engineering & Technology, Duy Tan University, Da Nang 550000, Vietnam*

† *To whom correspondence should be addressed*

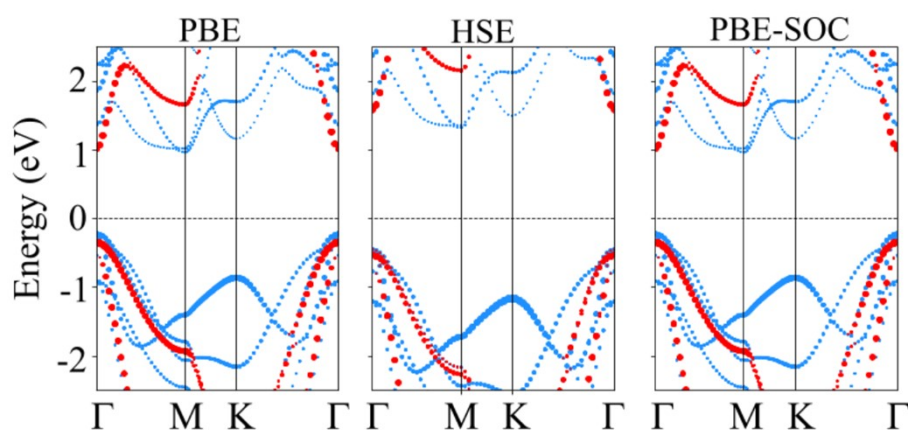

Fig. S1. Projected band structures of the GeH/SiSb heterostructure for the most favorable stacking pattern AB1 obtained by PBE, HSE and PBE-SOC methods.
